# Supplementary material for: Physical function and mental health trajectories in COVID-19 patients following invasive mechanical ventilation: a prospective observational study
Source: PubMed Central journal article supplement (PMC10477337; doi:10.1038/s41598-023-41684-3), 2023-09-04
Supplement: 41598_2023_41684_MOESM1_ESM.pdf [file 41598_2023_41684_MOESM1_ESM.pdf]

# **Physical function and mental health trajectories in COVID-19 patients following invasive mechanical ventilation: a prospective observational study**

Hiromasa Yamamoto<sup>1†</sup>, Shinya Tanaka<sup>1†</sup>, Daisuke Kasugai<sup>2\*</sup>, Miho Shimizu<sup>3</sup>, Yohei Tsuchikawa<sup>1</sup>, Yuto Hori<sup>1</sup>, Yuki Fugane<sup>1</sup>, Takayuki Inoue<sup>1</sup>, Motoki Nagaya<sup>1</sup>, Norihito Omote<sup>4</sup>, Michiko Higashi<sup>2</sup>, Takanori Yamamoto<sup>2</sup>, Naruhiro Jingushi<sup>2</sup>, Atsushi Numaguchi<sup>2</sup>, Yukari Goto<sup>2</sup>, Yoshihiro Nishida<sup>1,5</sup>

<sup>1</sup> Department of Rehabilitation, Nagoya University Hospital, Nagoya, Japan

<sup>2</sup> Department of Emergency and Critical Care Medicine, Nagoya University Graduate School of Medicine, Nagoya, Japan

<sup>3</sup> Department of Rehabilitation, Mie University Hospital, Tsu, Japan

<sup>4</sup> Department of Respiratory Medicine, Nagoya University Graduate School of Medicine, Nagoya, Japan

<sup>5</sup> Department of Orthopaedic Surgery, Nagoya University Graduate School of Medicine, Nagoya, Japan

<sup>†</sup>Hiromasa Yamamoto and Shinya Tanaka have contributed equally to this work.

**Table S1.** Baseline Characteristics, ICU therapy, and ICU outcomes (Analysis 2)

| Factor                                   | Overall<br>(n=32) | Short IMV<br>(n=19; 59%) | Prolonged IMV<br>(n=13; 41%) | P value |
|------------------------------------------|-------------------|--------------------------|------------------------------|---------|
| Age (yrs)                                | 60 [52-69]        | 56 [51-69]               | 63 [57-68]                   | 0.198   |
| ≥65 (%)                                  | 10 (31.2)         | 6 (31.6)                 | 4 (30.8)                     | 1.000   |
| Male (%)                                 | 55 (85.9)         | 27 (79.4)                | 28 (93.3)                    | 0.156   |
| BMI (kg/m <sup>2</sup> )                 | 24.7 [22.7-26.6]  | 25.3 [22.6-27.6]         | 23.8 [23.2-25.3]             | 0.432   |
| <25                                      | 18 (56.2)         | 9 (47.4)                 | 9 (69.2)                     | 0.515   |
| 25 to <30                                | 10 (31.2)         | 7 (36.8)                 | 3 (23.1)                     |         |
| ≥30                                      | 4 (12.5)          | 3 (15.8)                 | 1 ( 7.7)                     |         |
| 4C mortality score                       | 12 [10-13]        | 10 [10-13]               | 12 [11-14]                   | 0.439   |
| SOFA score                               | 10 [8-11]         | 10 [8-12]                | 10 [9-11]                    | 0.727   |
| APACHE II score                          | 21 [19-24]        | 21 [19-24]               | 21 [18-25]                   | 0.923   |
| PaO <sub>2</sub> /FiO <sub>2</sub> ratio | 121 [75-157]      | 115 [77-144]             | 148 [75-209]                 | 0.409   |
| Clinical frailty scale score             | 3 [2-3]           | 3 [2-3]                  | 3 [2-3]                      | 0.623   |
| Living alone (%)                         | 10 (31.2)         | 4 (21.1)                 | 6 (46.2)                     | 0.244   |
| Transfer from other hospitals (%)        | 24 (75.0)         | 17 (89.5)                | 7 (53.8)                     | 0.038   |
| Comorbidities (%)                        |                   |                          |                              |         |
| Hypertension                             | 15 (46.9)         | 8 (42.1)                 | 7 (53.8)                     | 0.720   |
| Diabetes mellitus                        | 11 (34.4)         | 6 (31.6)                 | 5 (38.5)                     | 0.721   |
| Heart disease                            | 5 (15.6)          | 2 (10.5)                 | 3 (23.1)                     | 0.374   |
| Cerebrovascular disease                  | 2 (6.2)           | 0 (0.0)                  | 2 (15.4)                     | 0.157   |
| Chronic pulmonary disease                | 1 (3.1)           | 1 (5.3)                  | 0 (0.0)                      | 1.000   |
| Renal dysfunction                        | 16 (50.0)         | 8 (42.1)                 | 8 (61.5)                     | 0.473   |
| Cancer                                   | 6 (18.8)          | 3 (15.8)                 | 3 (23.1)                     | 0.666   |
| Laboratory data                          |                   |                          |                              |         |
| Albumin (g/dL)                           | 2.9 [2.7-3.1]     | 2.8 [2.7-3.1]            | 3.0 [2.7-3.4]                | 0.375   |
| Hemoglobin (g/dL)                        | 13.7 [12.6-15.2]  | 14.7 [13.3-15.4]         | 12.7 [10.8-13.6]             | 0.068   |
| BUN (mg/dL)                              | 23 [18-29]        | 26 [17-29]               | 20 [19-27]                   | 0.715   |
| Creatinine (mg/dL)                       | 0.89 [0.72-1.21]  | 0.79 [0.69-1.21]         | 0.97 [0.84-1.21]             | 0.318   |
| D-dimer (ug/mL)                          | 1.45 [0.65-2.42]  | 1.25 [0.55-1.80]         | 2.40 [1.70-4.60]             | 0.111   |
| CRP (mg/dL)                              | 6.56 [4.86-11.08] | 6.53 [4.86-11.09]        | 8.84 [4.26-10.11]            | 1.000   |
| BNP (pg/mL)                              | 22 [11-87]        | 20 [8-44]                | 53 [12-110]                  | 0.414   |
| KL-6 (U/mL)                              | 370 [251-474]     | 370 [266-458]            | 370 [205-489]                | 0.632   |
| ICU therapy (%)                          |                   |                          |                              |         |
| ECMO                                     | 1 (3.1)           | 0 (0.0)                  | 1 (7.7)                      | 0.406   |
| Prone position                           | 16 (50.0)         | 9 (47.4)                 | 7 (53.8)                     | 1.000   |
| Tracheostomy                             | 4 (12.5)          | 0 (0.0)                  | 4 (30.8)                     | 0.020   |
| Steroid pulse therapy                    | 27 (84.4)         | 17 (89.5)                | 10 (76.9)                    | 0.374   |
| Neuromuscular blockade                   | 8 (25.0)          | 5 (26.3)                 | 3 (23.1)                     | 1.000   |
| Duration of sedation (days)              | 7 [4-8]           | 5 [3-6]                  | 9 [8-11]                     | <0.001  |
| Duration of ventilation (days)           | 9 [7-11]          | 7 [5-9]                  | 15 [10-21]                   | <0.001  |
| ICU outcomes                             |                   |                          |                              |         |
| Time to first rehabilitation (days)      | 6 [4-7]           | 5 [4-7]                  | 7 [5-13]                     | 0.047   |
| Time to first mobilize (days)            | 8 [7-12]          | 7 [5-8]                  | 12 [10-17]                   | 0.002   |
| ICU LOS (days)                           | 11 [9-18]         | 10 [7-11]                | 18 [13-25]                   | <0.001  |

Values are expressed as n (%) or median [interquartile range].

APACHE II, Acute Physiology and Chronic Health Evaluation II; BMI, body mass index; BNP, B-type natriuretic peptide; BUN, blood urea nitrogen; CRP, C-reactive protein; ECMO, extracorporeal membrane oxygenation; ICU, intensive care unit; KL-6, Krebs von den Lungen-6; IMV, invasive mechanical ventilation; LOS, length of stay; PaO<sub>2</sub>/FiO<sub>2</sub>, partial pressure of oxygen/fraction of inspired oxygen; SOFA, Sequential Organ Failure Assessment.

**Table S2.** EQ-5D-5L score in each dimension at 6 months (Analysis 3)

| Factor                                                            | Overall<br>(n=42) | Short IMV<br>(n=21; 50%) | Prolonged<br>IMV<br>(n=21; 50%) |
|-------------------------------------------------------------------|-------------------|--------------------------|---------------------------------|
| <b>Mobility</b>                                                   |                   |                          |                                 |
| Score 1: I have no problems with walking around                   | 27 (64.3)         | 18 (85.7)                | 9 (42.9)                        |
| Score 2: I have slight problems with walking around               | 10 (23.8)         | 3 (14.3)                 | 7 (33.3)                        |
| Score 3: I have moderate problems with walking around             | 3 (7.1)           | 0 (0)                    | 3 (14.3)                        |
| Score 4: I have severe problems with walking around               | 2 (4.8)           | 0 (0)                    | 2 (9.5)                         |
| Score 5: I am unable to walk around                               | 0 (0)             | 0 (0)                    | 0 (0)                           |
| <b>Self-care</b>                                                  |                   |                          |                                 |
| Score 1: I have no problems with washing or dressing myself       | 36 (85.7)         | 21 (100.0)               | 15 (71.4)                       |
| Score 2: I have slight problems with washing or dressing myself   | 6 (14.3)          | 0 (0)                    | 6 (28.6)                        |
| Score 3: I have moderate problems with washing or dressing myself | 0 (0)             | 0 (0)                    | 0 (0)                           |
| Score 4: I have severe problems with washing or dressing myself   | 0 (0)             | 0 (0)                    | 0 (0)                           |
| Score 5: I am unable to wash or dress myself                      | 0 (0)             | 0 (0)                    | 0 (0)                           |
| <b>Usual activities</b>                                           |                   |                          |                                 |
| Score 1: I have no problems doing my usual activities             | 28 (66.7)         | 18 (85.7)                | 10 (47.6)                       |
| Score 2: I have slight problems doing my usual activities         | 10 (23.8)         | 3 (14.3)                 | 7 (33.3)                        |
| Score 3: I have moderate problems doing my usual activities       | 3 (7.1)           | 0 (0)                    | 3 (14.3)                        |
| Score 4: I have severe problems doing my usual activities         | 0 (0)             | 0 (0)                    | 0 (0)                           |
| Score 5: I am unable to do my usual activities                    | 1 (2.4)           | 0 (0)                    | 1 (4.8)                         |
| <b>Pain/discomfort</b>                                            |                   |                          |                                 |
| Score 1: I have no pain or discomfort                             | 25 (59.5)         | 14 (66.7)                | 11 (52.4)                       |
| Score 2: I have slight pain or discomfort                         | 12 (28.6)         | 7 (33.3)                 | 5 (23.8)                        |
| Score 3: I have moderate pain or discomfort                       | 5 (11.9)          | 0 (0)                    | 5 (23.8)                        |
| Score 4: I have severe pain or discomfort                         | 0 (0)             | 0 (0)                    | 0 (0)                           |
| Score 5: I have extreme pain or discomfort                        | 0 (0)             | 0 (0)                    | 0 (0)                           |
| <b>Anxiety/depression</b>                                         |                   |                          |                                 |
| Score 1: I am not anxious or depressed                            | 28 (66.7)         | 17 (81.0)                | 11 (52.4)                       |
| Score 2: I am slightly anxious or depressed                       | 12 (28.6)         | 4 (19.0)                 | 8 (38.1)                        |
| Score 3: I am moderately anxious or depressed                     | 1 (2.4)           | 0 (0)                    | 1 (4.8)                         |
| Score 4: I am severely anxious or depressed                       | 1 (2.4)           | 0 (0)                    | 1 (4.8)                         |
| Score 5: I am extremely anxious or depressed                      | 0 (0)             | 0 (0)                    | 0 (0)                           |

Values are expressed as n (%).

EQ-5D-5L, EuroQol five-dimension five-level; IMV, invasive mechanical ventilation.
